# Supplementary material for: Effect of ZnO and PEDOT:PSS charge selective layers on photovoltage of cuprous oxide (Cu2O) heterojunction solar cells
Source: Royal Society of Chemistry journal article supplement (doi:10.1039/d4se00416g), 2024-01-01
Supplement: d4se00416g1.pdf [file d4se00416g1.pdf]

Supporting information – 4 pages

# Effect of ZnO and PEDOT:PSS Charge Selective Layers on Photovoltage of Cuprous Oxide ( $\text{Cu}_2\text{O}$ ) Heterojunction Solar Cells

Jiajun Li, Hervin Errol T. Mendoza, Anna Kundmann, and Frank E. Osterloh\*

*Department of Chemistry, University of California, Davis. One Shields Avenue, Davis, CA, 95616, USA. Fax: (+1)530 752 8995; E-mail: [fosterloh@ucdavis.edu](mailto:fosterloh@ucdavis.edu).*

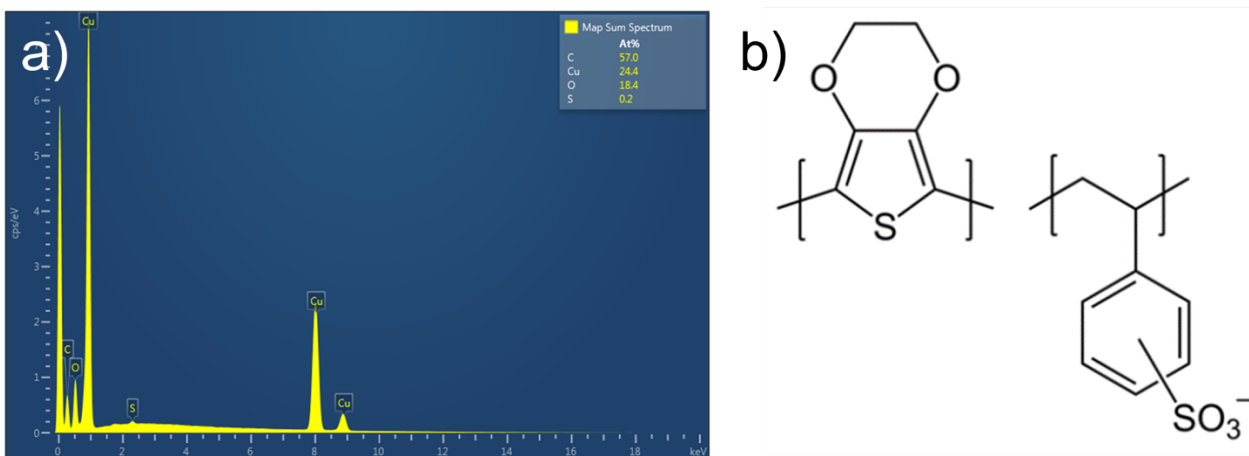

**Figure S1.** a) EDX data for PEDOT:PSS on  $\text{Cu}_2\text{O}$  on ZnO on FTO and b) chemical structure of PEDOT:PSS. No contribution of the ZnO and  $\text{SnO}_2$  underlayers to the EDX signal is observed because the 20 kV electrons only probe the top 2  $\mu\text{m}$  of the 3  $\mu\text{m}$   $\text{Cu}_2\text{O}$ /PEDOT:PSS stack.

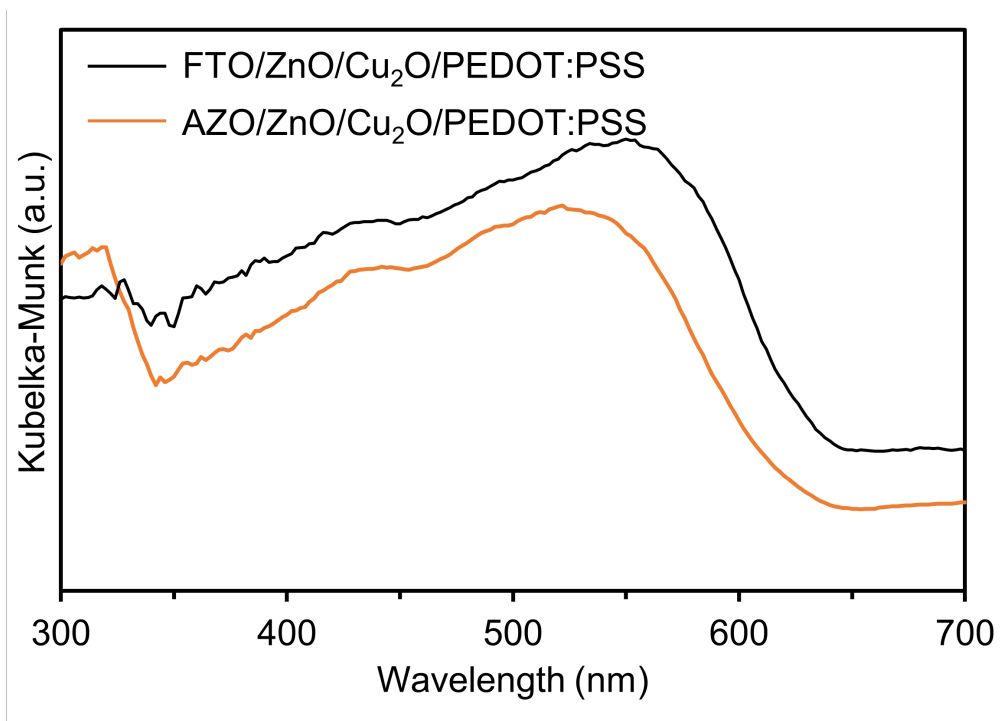

**Figure S2.** Diffuse reflectance optical spectra for FTO/ZnO/Cu<sub>2</sub>O/PEDOT:PSS and AZO/ZnO/Cu<sub>2</sub>O/PEDOT:PSS.

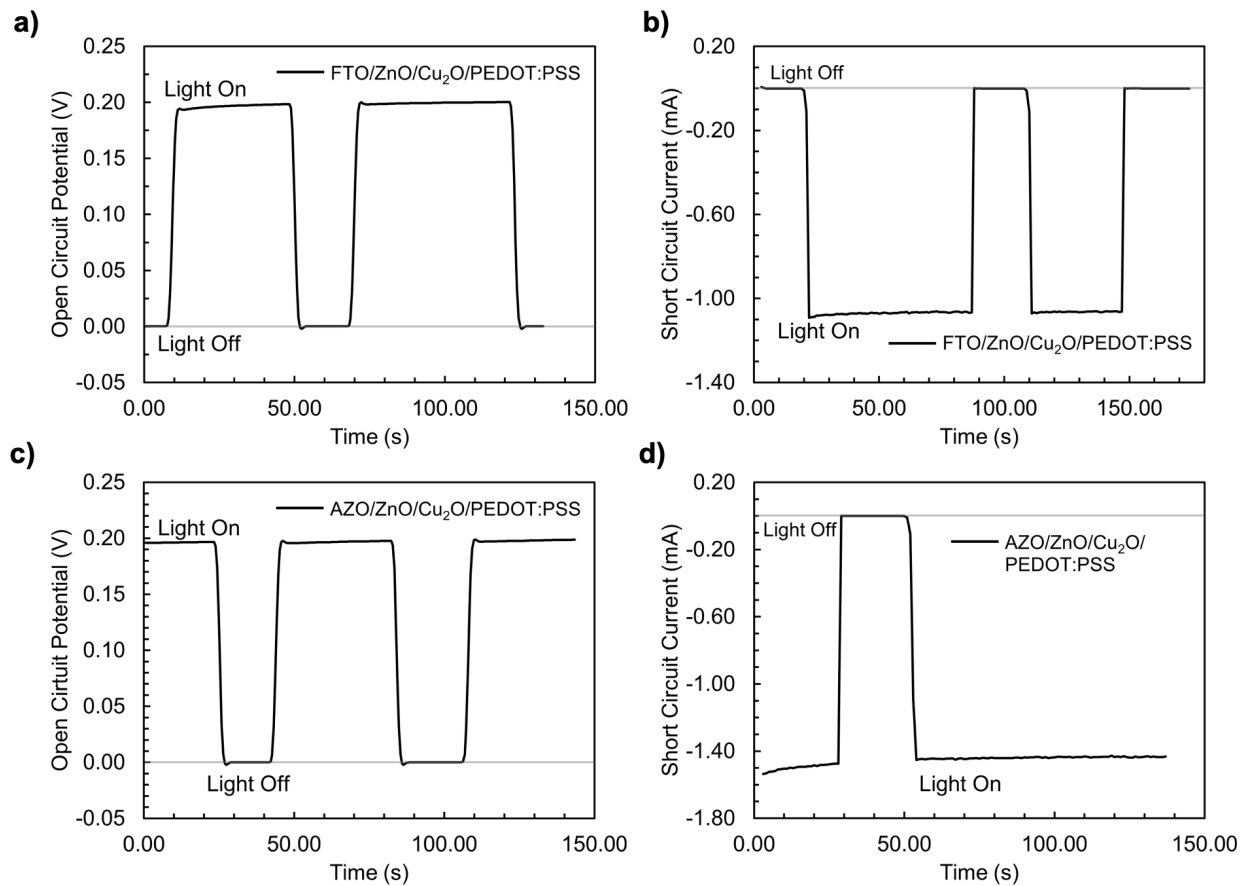

**Figure S3.** Open circuit voltage and short circuit current versus time under AM1.5 illumination for a,b) FTO/ZnO/Cu<sub>2</sub>O/PEDOT:PSS and c,d) AZO/ZnO/Cu<sub>2</sub>O/PEDOT:PSS.

**Table S1.** Photovoltaic data for FTO/ZnO/Cu<sub>2</sub>O/PEDOT:PSS/Ni devices under AM 1.5 illumination.

|                                           | <b>Trial 1</b> | <b>Trial 2</b> | <b>Trial 3</b> | <b>Trial 4</b> | <b>Average</b> | <b>STD</b> |
|-------------------------------------------|----------------|----------------|----------------|----------------|----------------|------------|
| <b>J<sub>sc</sub> (mA/cm<sup>2</sup>)</b> | 0.9            | 1              | 0.7            | 0.8            | 0.85           | 0.11       |
| <b>V<sub>oc</sub> (mV)</b>                | 160            | 160            | 155            | 164            | 159.8          | 3.19       |
| <b>FF (%)</b>                             | 27.06          | 23             | 28             | 22             | 25.01          | 2.56       |
| <b>PCE (%)</b>                            | 0.039          | 0.037          | 0.030          | 0.029          | 0.034          | 0.004      |

**Table S2.** Photovoltaic data for AZO/ZnO/Cu<sub>2</sub>O/PEDOT:PSS/Ni devices under AM 1.5 illumination.

|                                           | <b>Trial 1</b> | <b>Trial 2</b> | <b>Trial 3</b> | <b>Trial 4</b> | <b>Average</b> | <b>STD</b> |
|-------------------------------------------|----------------|----------------|----------------|----------------|----------------|------------|
| <b>J<sub>sc</sub> (mA/cm<sup>2</sup>)</b> | 1.15           | 1.00           | 0.93           | 1.28           | 1.09           | 0.14       |
| <b>V<sub>oc</sub> (mV)</b>                | 185            | 175            | 180            | 195            | 183.8          | 7.40       |
| <b>FF (%)</b>                             | 25.06          | 26.03          | 25.05          | 27.24          | 25.85          | 0.90       |
| <b>PCE (%)</b>                            | 0.05           | 0.05           | 0.04           | 0.07           | 0.05           | 0.01       |
